# Supplementary material for: Baseline Assessment of Poultry Production, Pharmaceutical Product Use, and Related Challenges on Commercial Poultry Flocks in Kano and Oyo States of Nigeria
Source: MDPI journal article supplement (doi:10.3390/vetsci8120315), 2021-12-08
Supplement: s1 [file s1]

## **Supplementary Material**

**Table S1.** Respondent demographics and general farm characteristics as presented in Ekiri *et al.*, unpublished.

| Variable                                                           | Response                                                 | Total respondents (n%) (n=43) | Respondents in Kano (n%) (n=27) | Respondents in Oyo (n%) (n=16) |
|--------------------------------------------------------------------|----------------------------------------------------------|-------------------------------|---------------------------------|--------------------------------|
| Age <sup>1</sup>                                                   | Under 35 years                                           | 6 (14.3)                      | 3 (11.5)                        | 3 (18.8)                       |
|                                                                    | 35 – 45 years                                            | 12 (28.6)                     | 10 (38.5)                       | 2 (12.5)                       |
|                                                                    | 46 – 60 years                                            | 20 (47.6)                     | 11 (42.3)                       | 9 (56.3)                       |
|                                                                    | Over 60 years                                            | 4 (9.5)                       | 2 (7.7)                         | 2 (12.5)                       |
| Gender <sup>1</sup>                                                | Male                                                     | 30 (71.4)                     | 16 (61.5)                       | 14 (87.5)                      |
|                                                                    | Female                                                   | 12 (28.6)                     | 10 (38.5)                       | 2 (12.5)                       |
| Years of experience in poultry farming                             | 0-5 years                                                | 7 (16.3)                      | 4 (14.8)                        | 3 (18.8)                       |
|                                                                    | 6-10 years                                               | 12 (27.9)                     | 7 (25.9)                        | 5 (31.3)                       |
|                                                                    | 11-20 years                                              | 16 (37.2)                     | 12 (44.4)                       | 4 (25.0)                       |
|                                                                    | Over 20 years                                            | 8 (18.6)                      | 4 (14.8)                        | 4 (25.0)                       |
| Current role on farm <sup>2</sup>                                  | Farm owner                                               | 29 (67.4)                     | 21 (77.8)                       | 8 (50.0)                       |
|                                                                    | Farm manager                                             | 16 (37.2)                     | 8 (29.6)                        | 8 (50.0)                       |
|                                                                    | Farm supervisor                                          | 0                             | 0                               | 0                              |
|                                                                    | Farm worker                                              | 0                             | 0                               | 0                              |
|                                                                    | Farm vet                                                 | 0                             | 0                               | 0                              |
|                                                                    | Other                                                    | 0                             | 0                               | 0                              |
| Years farm has been in existence                                   | 0-5 years                                                | 13 (30.2)                     | 8 (29.6)                        | 5 (31.3)                       |
|                                                                    | 6-10 years                                               | 19 (44.2)                     | 11 (40.7)                       | 8 (50.0)                       |
|                                                                    | 11-20 years                                              | 9 (20.9)                      | 7 (25.9)                        | 2 (12.5)                       |
|                                                                    | Over 20 years                                            | 2 (4.7)                       | 1 (3.7)                         | 1 (6.3)                        |
| Types of chickens kept on farm at present <sup>2</sup>             | Layers only <sup>3</sup> (chicks or adult birds)         | 21 (48.8)                     | 13 (48.1)                       | 8 (50.0)                       |
|                                                                    | Broilers only <sup>4</sup> (chicks or adult birds)       | 9 (20.9)                      | 7 (25.9)                        | 2 (12.5)                       |
|                                                                    | Layers and broilers <sup>5</sup> (chicks or adult birds) | 12 (27.9)                     | 7 (25.9)                        | 5 (31.3)                       |
|                                                                    | Breeders <sup>6</sup>                                    | 2 (4.7)                       | 0                               | 2 (12.5)                       |
|                                                                    |                                                          |                               |                                 |                                |
| Membership in poultry association at different levels <sup>2</sup> | Poultry association at zonal/local government            | 8 (18.6)                      | -                               | -                              |
|                                                                    | Poultry association at state level                       | 30 (69.8)                     | -                               | -                              |
|                                                                    | Poultry association at national level                    | 3 (7.0)                       | -                               | -                              |
|                                                                    | Other                                                    | 5 (11.6)                      | -                               | -                              |

<sup>1</sup> There were missing values for these variables: age group (n=1) and gender (n=1). <sup>2</sup> Respondents selected all applicable responses to these variables; column percentages may not add up to 100%. <sup>3</sup> Within the layer farms (n=21): n=4 also kept cockerels and n=1 kept other bird types (local chickens). <sup>4</sup> Within the broiler farms (n=9): n=1 also kept other bird types (local chickens and guinea fowl). <sup>5</sup> Within the mixed (layers and broilers) farms (n=12): n=1 kept breeder-broilers and breeder-layers (PS chicks/adults), n=1 also kept free-ranging chickens, n=4 kept cockerels, and n=1 kept other bird types (local chickens and guinea fowl). <sup>6</sup> Farms that kept breeders (n=2) included: one mixed farm (i.e., had both layers and breeders) that kept both breeder-broilers (PS chicks/adults) and breeder-layers (PS chicks/adults), and one farm that kept breeder-broilers only. Abbreviations: PS: Parent-stock.

**Table S2.** Average number of chicks at the beginning of the previous production cycle on farm (if applicable).

| Average number of chicks | State | n  | Mean  | SD    | Median | Min   | Max    |
|--------------------------|-------|----|-------|-------|--------|-------|--------|
| PS chicks                | Total | 2  | 5,500 | 2,121 | 5,500  | 4,000 | 7,000  |
|                          | Oyo   | 2  | 5,500 | 2,121 | 5,500  | 4,000 | 7,000  |
|                          | Kano  | 0  | NA    | NA    | NA     | NA    | NA     |
| Broiler chicks           | Total | 15 | 1,344 | 1,402 | 500    | 100   | 5,000  |
|                          | Oyo   | 4  | 2,565 | 2,007 | 2,530  | 200   | 5,000  |
|                          | Kano  | 11 | 900   | 855   | 500    | 100   | 2,500  |
| Pullet chicks            | Total | 35 | 5,531 | 5,380 | 4,000  | 300   | 26,000 |
|                          | Oyo   | 13 | 6,580 | 4,232 | 4,377  | 1,500 | 12,960 |
|                          | Kano  | 22 | 4,911 | 5,962 | 3,250  | 300   | 26,000 |
| Cockerel chicks          | Total | 5  | 174   | 195   | 100    | 20    | 500    |
|                          | Oyo   | 1  | 20    | NA    | 20     | 20    | 20     |
|                          | Kano  | 4  | 213   | 202   | 150    | 50    | 500    |

Abbreviations: NA, not applicable; PS, parent stock; SD, standard deviation.

**Table S3.** Average cost (NGN) of a one-day old chick hatched or purchased for raising on farm in the previous production/hatching cycle (if applicable).

| Average cost (NGN) of a one-day old chick | State | n  | Mean  | SD     | Median | Min   | Max    |
|-------------------------------------------|-------|----|-------|--------|--------|-------|--------|
| PS chicks                                 | Total | 0  | NA    | NA     | NA     | NA    | NA     |
|                                           | Oyo   | 0  | NA    | NA     | NA     | NA    | NA     |
|                                           | Kano  | 0  | NA    | NA     | NA     | NA    | NA     |
| Broiler chicks                            | Total | 15 | 302   | 183    | 270    | 120   | 920    |
|                                           | Oyo   | 3  | 463   | 398    | 280    | 190   | 920    |
|                                           | Kano  | 12 | 262   | 69     | 270    | 120   | 340    |
| Pullet chicks                             | Total | 31 | 2,406 | 11,623 | 200    | 120   | 65,000 |
|                                           | Oyo   | 9  | 600   | 625    | 220    | 170   | 1,700  |
|                                           | Kano  | 22 | 3,145 | 13,815 | 200    | 120   | 65,000 |
| Cockerel chicks                           | Total | 5  | 223   | 434    | 30     | 25    | 1,000  |
|                                           | Oyo   | 1  | 1,000 | NA     | 1,000  | 1,000 | 1,000  |
|                                           | Kano  | 4  | 29    | 3      | 30     | 25    | 30     |

Abbreviations: NA, not applicable; NGN, Nigerian Naira; PS, parent stock; SD, standard deviation. At the time of writing 1 US dollar = 411.400 NGN (August 2021).

**Table S4.** Average number of chicks hatched at hatchery/hatcheries on-farm in the previous production cycle (if applicable).

| Average number of chicks hatched in the previous production cycle | n | Mean   | SD | Median | Min    | Max    |
|-------------------------------------------------------------------|---|--------|----|--------|--------|--------|
| PS chicks                                                         | 0 | NA     | NA | NA     | NA     | NA     |
| Broiler chicks                                                    | 2 | 10,000 | 0  | 10,000 | 10,000 | 10,000 |
| Pullet chicks                                                     | 1 | 15,000 | NA | 15,000 | 15,000 | 15,000 |
| Cockerel chicks                                                   | 1 | 10,000 | NA | 10,000 | 10,000 | 10,000 |

Abbreviations: NA, not applicable; PS, parent stock; SD, standard deviation.

**Table S5.** Number of unproductive birds culled from farm during the previous production cycle.

| Average number of unproductive birds culled | State | n  | Mean | SD    | Median | Min | Max   |
|---------------------------------------------|-------|----|------|-------|--------|-----|-------|
| Layer                                       | Total | 27 | 381  | 1,082 | 30     | 0   | 5,228 |
|                                             | Oyo   | 10 | 24   | 27    | 15     | 0   | 75    |
|                                             | Kano  | 17 | 590  | 1,332 | 34     | 0   | 5,228 |
| Broiler                                     | Total | 14 | 24   | 19    | 18     | 0   | 70    |
|                                             | Oyo   | 4  | 15   | 4     | 14     | 10  | 20    |
|                                             | Kano  | 10 | 27   | 22    | 20     | 0   | 70    |
| GPS broiler                                 | Total | 0  | NA   | NA    | NA     | NA  | NA    |
|                                             | Oyo   | 0  | NA   | NA    | NA     | NA  | NA    |
|                                             | Kano  | 0  | NA   | NA    | NA     | NA  | NA    |
| PS broiler                                  | Total | 1  | 15   | NA    | 15     | 15  | 15    |
|                                             | Oyo   | 1  | 15   | NA    | 15     | 15  | 15    |
|                                             | Kano  | 0  | NA   | NA    | NA     | NA  | NA    |
| GPS layer                                   | Total | 0  | NA   | NA    | NA     | NA  | NA    |
|                                             | Oyo   | 0  | NA   | NA    | NA     | NA  | NA    |
|                                             | Kano  | 0  | NA   | NA    | NA     | NA  | NA    |
| PS layer                                    | Total | 0  | NA   | NA    | NA     | NA  | NA    |
|                                             | Oyo   | 0  | NA   | NA    | NA     | NA  | NA    |
|                                             | Kano  | 0  | NA   | NA    | NA     | NA  | NA    |
| Free-range chickens                         | Total | 0  | NA   | NA    | NA     | NA  | NA    |
|                                             | Oyo   | 0  | NA   | NA    | NA     | NA  | NA    |
|                                             | Kano  | 0  | NA   | NA    | NA     | NA  | NA    |
| Cockerel                                    | Total | 4  | 6    | 9     | 3      | 0   | 20    |
|                                             | Oyo   | 0  | NA   | NA    | NA     | NA  | NA    |
|                                             | Kano  | 4  | 6    | 9     | 3      | 0   | 20    |
| Other birds                                 | Total | 0  | NA   | NA    | NA     | NA  | NA    |
|                                             | Oyo   | 0  | NA   | NA    | NA     | NA  | NA    |
|                                             | Kano  | 0  | NA   | NA    | NA     | NA  | NA    |

Abbreviations: GPS, grandparent stock; NA, not applicable; PS, parent stock; SD, standard deviation.

**Table S6.** Estimated cost of vaccines (NGN) per 1000 birds in the previous production cycle.

| Disease vaccinated against                                              |                        |                    | n  | Mean   | SD     | Median | Min    | Max    |
|-------------------------------------------------------------------------|------------------------|--------------------|----|--------|--------|--------|--------|--------|
| Infectious bronchitis                                                   | State                  | Total              | 3  | 1,683  | 325    | 1,700  | 1,350  | 2,000  |
|                                                                         |                        | Oyo                | 3  | 1,683  | 325    | 1,700  | 1,350  | 2,000  |
|                                                                         |                        | Kano               | 0  | NA     | NA     | NA     | NA     | NA     |
|                                                                         | Farm type              | Layers             | 0  | NA     | NA     | NA     | NA     | NA     |
|                                                                         |                        | Broilers           | 0  | NA     | NA     | NA     | NA     | NA     |
|                                                                         |                        | Mixed <sup>1</sup> | 3  | 1,683  | 325    | 1,700  | 1,350  | 2,000  |
| Marek's disease                                                         | State                  | Total              | 13 | 5,423  | 1,739  | 5,000  | 2,200  | 9,000  |
|                                                                         |                        | Oyo                | 3  | 3,900  | 1,493  | 4,500  | 2,200  | 5,000  |
|                                                                         |                        | Kano               | 10 | 5,880  | 1,592  | 6,000  | 4,000  | 9,000  |
|                                                                         | Farm type              | Layers             | 6  | 5,367  | 2,260  | 5,250  | 2,200  | 9,000  |
|                                                                         |                        | Broilers           | 1  | 4,800  | NA     | 4,800  | 4,800  | 4,800  |
|                                                                         |                        | Mixed              | 6  | 5,583  | 1,429  | 5,500  | 4,000  | 8,000  |
| Newcastle disease                                                       | State                  | Total              | 35 | 7,524  | 8,388  | 2,500  | 950    | 26,200 |
|                                                                         |                        | Oyo                | 8  | 1,304  | 465    | 1,000  | 950    | 2,000  |
|                                                                         |                        | Kano               | 27 | 9,367  | 8,747  | 4,900  | 1,100  | 26,200 |
|                                                                         | Farm type              | Layers             | 16 | 11,597 | 9,459  | 9,600  | 950    | 26,200 |
|                                                                         |                        | Broilers           | 8  | 3,638  | 5,116  | 1,750  | 1,200  | 16,200 |
|                                                                         |                        | Mixed              | 10 | 4,718  | 6,371  | 1,850  | 980    | 21,500 |
| Newcastle disease and<br>Infectious bronchitis                          | State                  | Total              | 5  | 4,500  | 4,868  | 2,500  | 2,000  | 13,200 |
|                                                                         |                        | Oyo                | 5  | 4,500  | 4,868  | 2,500  | 2,000  | 13,200 |
|                                                                         |                        | Kano               | 0  | NA     | NA     | NA     | NA     | NA     |
|                                                                         | Farm type <sup>2</sup> | Layers             | 3  | 6,000  | 6,236  | 2,500  | 2,300  | 13,200 |
|                                                                         |                        | Broilers           | 0  | NA     | NA     | NA     | NA     | NA     |
|                                                                         |                        | Mixed              | 1  | 2,500  | NA     | 2,500  | 2,500  | 2,500  |
| Newcastle disease and<br>Infectious bronchitis and<br>Egg drop syndrome | State                  | Total              | 17 | 25,353 | 12,649 | 22,000 | 15,000 | 70,000 |
|                                                                         |                        | Oyo                | 8  | 26,625 | 18,654 | 19,000 | 15,000 | 70,000 |
|                                                                         |                        | Kano               | 9  | 24,222 | 3,528  | 25,000 | 19,000 | 30,000 |
|                                                                         | Farm type              | Layers             | 9  | 26,889 | 16,930 | 24,000 | 15,000 | 70,000 |
|                                                                         |                        | Broilers           | 0  | NA     | NA     | NA     | NA     | NA     |
|                                                                         |                        | Mixed              | 7  | 24,143 | 5,872  | 22,000 | 18,000 | 35,000 |
| Newcastle disease and<br>Egg drop syndrome                              | State                  | Total              | 1  | 21,000 | NA     | 21,000 | 21,000 | 21,000 |
|                                                                         |                        | Oyo                | 1  | 21,000 | NA     | 21,000 | 21,000 | 21,000 |
|                                                                         |                        | Kano               | 0  | NA     | NA     | NA     | NA     | NA     |
|                                                                         | Farm type              | Layers             | 1  | 21,000 | NA     | 21,000 | 21,000 | 21,000 |
|                                                                         |                        | Broilers           | 0  | NA     | NA     | NA     | NA     | NA     |
|                                                                         |                        | Mixed              | 0  | NA     | NA     | NA     | NA     | NA     |
| Newcastle disease and<br>Infectious coryza                              | State                  | Total              | 2  | 17,500 | 3,536  | 17,500 | 15,000 | 20,000 |
|                                                                         |                        | Oyo                | 1  | 15,000 | NA     | 15,000 | 15,000 | 15,000 |
|                                                                         |                        | Kano               | 1  | 20,000 | NA     | 20,000 | 20,000 | 20,000 |
|                                                                         | Farm type              | Layers             | 1  | 20,000 | NA     | 20,000 | 20,000 | 20,000 |
|                                                                         |                        | Broilers           | 0  | NA     | NA     | NA     | NA     | NA     |
|                                                                         |                        | Mixed              | 0  | NA     | NA     | NA     | NA     | NA     |
| Infectious bursal disease                                               | State                  | Total              | 32 | 1,984  | 1,019  | 1,750  | 600    | 5,000  |
|                                                                         |                        | Oyo                | 7  | 2,120  | 1,437  | 1,500  | 920    | 5,000  |
|                                                                         |                        | Kano               | 25 | 1,946  | 905    | 1,800  | 600    | 5,000  |
|                                                                         | Farm type              | Layers             | 16 | 1,818  | 646    | 1,800  | 900    | 3,600  |
|                                                                         |                        | Broilers           | 8  | 2,675  | 1,659  | 2,200  | 600    | 5,000  |
|                                                                         |                        | Mixed              | 7  | 1,643  | 479    | 1,700  | 1,000  | 2,500  |

**Table S6.** Continued.

| Disease vaccinated against                                     |           |          | n  | Mean   | SD    | Median | Min    | Max    |
|----------------------------------------------------------------|-----------|----------|----|--------|-------|--------|--------|--------|
| Avian encephalomyelitis                                        | State     | Total    | 1  | 5,000  | NA    | 5,000  | 5,000  | 5,000  |
|                                                                |           | Oyo      | 1  | 5,000  | NA    | 5,000  | 5,000  | 5,000  |
|                                                                |           | Kano     | 0  | NA     | NA    | NA     | NA     | NA     |
|                                                                | Farm type | Layers   | 0  | NA     | NA    | NA     | NA     | NA     |
|                                                                |           | Broilers | 0  | NA     | NA    | NA     | NA     | NA     |
|                                                                |           | Mixed    | 0  | NA     | NA    | NA     | NA     | NA     |
| Egg drop syndrome                                              | State     | Total    | 3  | 12,667 | 4,041 | 15,000 | 8,000  | 15,000 |
|                                                                |           | Oyo      | 3  | 12,667 | 4,041 | 15,000 | 8,000  | 15,000 |
|                                                                |           | Kano     | 0  | NA     | NA    | NA     | NA     | NA     |
|                                                                | Farm type | Layers   | 1  | 15,000 | NA    | 15,000 | 15,000 | 15,000 |
|                                                                |           | Broilers | 0  | NA     | NA    | NA     | NA     | NA     |
|                                                                |           | Mixed    | 1  | 8,000  | NA    | 8,000  | 8,000  | 8,000  |
| Fowl pox                                                       | State     | Total    | 27 | 2,236  | 1,299 | 2,200  | 500    | 8,000  |
|                                                                |           | Oyo      | 6  | 3,047  | 2,708 | 2,750  | 500    | 8,000  |
|                                                                |           | Kano     | 21 | 2,005  | 330   | 2,100  | 1,300  | 2,600  |
|                                                                | Farm type | Layers   | 15 | 1,993  | 658   | 2,100  | 500    | 3,500  |
|                                                                |           | Broilers | 2  | 2,000  | 424   | 2,000  | 1,700  | 2,300  |
|                                                                |           | Mixed    | 9  | 2,053  | 626   | 2,200  | 780    | 3,000  |
| Colibacillosis                                                 | State     | Total    | 3  | 7,167  | 3,819 | 8,000  | 3,000  | 10,500 |
|                                                                |           | Oyo      | 1  | 3,000  | NA    | 3,000  | 3,000  | 3,000  |
|                                                                |           | Kano     | 2  | 9,250  | 1,768 | 9,250  | 8,000  | 10,500 |
|                                                                | Farm type | Layers   | 2  | 9,250  | 1,768 | 9,250  | 8,000  | 10,500 |
|                                                                |           | Broilers | 0  | NA     | NA    | NA     | NA     | NA     |
|                                                                |           | Mixed    | 1  | 3,000  | NA    | 3,000  | 3,000  | 3,000  |
| Fowl cholera (pasteurellosis) and fowl typhoid (salmonellosis) | State     | Total    | 1  | 1,400  | NA    | 1,400  | 1,400  | 1,400  |
|                                                                |           | Oyo      | 1  | 1,400  | NA    | 1,400  | 1,400  | 1,400  |
|                                                                |           | Kano     | 0  | NA     | NA    | NA     | NA     | NA     |
|                                                                | Farm type | Layers   | 1  | 1,400  | NA    | 1,400  | 1,400  | 1,400  |
|                                                                |           | Broilers | 0  | NA     | NA    | NA     | NA     | NA     |
|                                                                |           | Mixed    | 0  | NA     | NA    | NA     | NA     | NA     |
| Mycoplasmosis                                                  | State     | Total    | 3  | 6,000  | 7,795 | 1,600  | 1,400  | 15,000 |
|                                                                |           | Oyo      | 3  | 6,000  | 7,795 | 1,600  | 1,400  | 15,000 |
|                                                                |           | Kano     | 0  | NA     | NA    | NA     | NA     | NA     |
|                                                                | Farm type | Layers   | 1  | 1,400  | NA    | 1,400  | 1,400  | 1,400  |
|                                                                |           | Broilers | 1  | 15,000 | NA    | 15,000 | 15,000 | 15,000 |
|                                                                |           | Mixed    | 1  | 1,600  | NA    | 1,600  | 1,600  | 1,600  |
| Coccidiosis                                                    | State     | Total    | 3  | 6,200  | 4,257 | 7,000  | 1,600  | 10,000 |
|                                                                |           | Oyo      | 3  | 6,200  | 4,257 | 7,000  | 1,600  | 10,000 |
|                                                                |           | Kano     | 0  | NA     | NA    | NA     | NA     | NA     |
|                                                                | Farm type | Layers   | 0  | NA     | NA    | NA     | NA     | NA     |
|                                                                |           | Broilers | 1  | 10,000 | NA    | 10,000 | 10,000 | 10,000 |
|                                                                |           | Mixed    | 1  | 1,600  | NA    | 1,600  | 1,600  | 1,600  |
| Avian encephalomyelitis and Fowl pox <sup>3</sup>              |           | Total    | 0  | NA     | NA    | NA     | NA     |        |
| Tenosynovitis <sup>3</sup>                                     |           | Total    | 0  | NA     | NA    | NA     | NA     |        |
| Other vaccinations <sup>3</sup>                                |           | Total    | 0  | NA     | NA    | NA     | NA     |        |

<sup>1</sup>Mixed farms kept both layers and broilers. <sup>2</sup>Numbers by farm type may not add up to the total as there were two farms that kept breeders only (these were not included in any of the other farm categories). <sup>3</sup>Analysis by state and farm type are not shown for these diseases, as the total number of respondents was zero. Abbreviations: NA, not applicable; NGN, Nigerian Naira; SD, standard deviation. At the time of writing 1 US dollar = 411.400 NGN (August 2021).



**Table S7.** Antibiotics used on the farm during the previous production cycle.

| Did you use antibiotics products in the previous production cycle to treat birds on your farm? |  | Total respondents<br>(n%)<br>(n=43) | Respondents<br>in Kano (n%)<br>(n=27) | Respondents<br>in Oyo (n%)<br>(n=16) |
|------------------------------------------------------------------------------------------------|--|-------------------------------------|---------------------------------------|--------------------------------------|
| No                                                                                             |  | 1 (2.3)                             | 0                                     | 1 (6.3)                              |
| Yes                                                                                            |  | 42 (97.7)                           | 27 (100)                              | 15 (93.7)                            |

  

| What antibiotics products did you use in the previous production cycle? |                                 | Total respondents<br>(n%)<br>(n=42) <sup>1</sup> | Respondents<br>in Kano (n%)<br>(n=27) <sup>1</sup> | Respondents<br>in Oyo (n%)<br>(n=15) <sup>1</sup> |
|-------------------------------------------------------------------------|---------------------------------|--------------------------------------------------|----------------------------------------------------|---------------------------------------------------|
| Local commercial name<br>(manufacturer)                                 | Antimicrobial                   |                                                  |                                                    |                                                   |
| Doxygen (Kepro)                                                         | Doxycycline & Gentamicin        | 27 (64.3)                                        | 16 (59.3)                                          | 11 (73.3)                                         |
| Tylosin (not specified)                                                 | Tylosin                         | 25 (59.5)                                        | 14 (51.9)                                          | 11 (73.3)                                         |
| Conflox (Animal care)                                                   | Enrofloxacin                    | 23 (54.8)                                        | 14 (51.9)                                          | 9 (60.0)                                          |
| Neoceryl (Animal care)                                                  | Neomycin & Multivitamins        | 20 (47.6)                                        | 15 (55.6)                                          | 5 (33.3)                                          |
| Centregent (Centre)                                                     | Gentamicin                      | 19 (45.2)                                        | 10 (37.0)                                          | 9 (60.0)                                          |
| Kenflox (Kepro)                                                         | Enrofloxacin                    | 18 (42.9)                                        | 15 (55.6)                                          | 3 (20.0)                                          |
| Other antibiotics                                                       | Other antibiotics               | 15 (35.7)                                        | 14 (51.9)                                          | 1 (6.7)                                           |
| Kepro-Oxy 5% (Kepro)                                                    | Oxytetracycline                 | 14 (33.3)                                        | 8 (29.6)                                           | 6 (40.0)                                          |
| GenTylo (Centre)                                                        | Gentamycin & Tylosin            | 13 (31.0)                                        | 7 (25.9)                                           | 6 (40.0)                                          |
| Ciprovect (Globavet)                                                    | Ciprofloxacin                   | 12 (28.6)                                        | 8 (29.6)                                           | 4 (26.7)                                          |
| Biaflox (Biacom)                                                        | Enrofloxacin                    | 11 (26.2)                                        | 2 (7.4)                                            | 9 (60.0)                                          |
| Fura                                                                    | Furathadol                      | 11 (26.2)                                        | 9 (33.3)                                           | 2 (13.3)                                          |
| Oxytetracycline 50%                                                     | Oxytetracycline                 | 11 (26.2)                                        | 9 (33.3)                                           | 2 (13.3)                                          |
| Anicyline (Animal Care)                                                 | Penicillin & Streptomycin       | 9 (21.4)                                         | 5 (18.5)                                           | 4 (26.7)                                          |
| Floxinol (Jubili Agrotech)                                              | Enrofloxacin                    | 7 (16.7)                                         | 4 (14.8)                                           | 3 (20.0)                                          |
| Tetracin (Jubili Agrotech)                                              | Oxytetracycline                 | 5 (11.9)                                         | 4 (14.8)                                           | 1 (6.7)                                           |
| Enrovect (Globavet)                                                     | Enrofloxacin                    | 3 (7.1)                                          | 1 (3.7)                                            | 2 (13.3)                                          |
| Norflox                                                                 | Norfloxacin                     | 3 (7.1)                                          | 3 (11.1)                                           | 0                                                 |
| Enrocoli-Max                                                            | Enrofloxacin & Colistin         | 2 (4.8)                                          | 0                                                  | 2 (13.3)                                          |
| Flumetin. E.t.c (Augmentin)                                             | Amoxicillin clavulanate         | 1 (2.4)                                          | 0                                                  | 1 (6.7)                                           |
| Vapcogent (Vapco)                                                       | Gentamin                        | 1 (2.4)                                          | 0                                                  | 1 (6.7)                                           |
| SulfaThrim                                                              | Sulfaquinoxaline & Trimethoprim | 0                                                | 0                                                  | 0                                                 |

<sup>1</sup> Respondents selected all applicable antibiotics; therefore, column percentages do not add up to 100%.

**Table S8.** Duration of antibiotic use during the previous production cycle.

| For how long did you use the selected antibiotics in your flock during the previous production cycle if known? <sup>1</sup> |                                 | Total respondents (n) | < 3 days (n %) | 3-5 days (n %) | 6-7 days (n %) | >7 days (n %) | Not known (n %) |
|-----------------------------------------------------------------------------------------------------------------------------|---------------------------------|-----------------------|----------------|----------------|----------------|---------------|-----------------|
| Commercial name (manufacturer)                                                                                              | Antimicrobial                   |                       |                |                |                |               |                 |
| Anicyline (Animal Care)                                                                                                     | Penicillin & Streptomycin       | 9                     | 0              | 9 (100)        | 0              | 0             | 0               |
| Biaflox (Biacom)                                                                                                            | Enrofloxacin                    | 11                    | 0              | 11 (100)       | 0              | 0             | 0               |
| Centregent (Centre)                                                                                                         | Gentamicin                      | 19                    | 0              | 1 (5.3)        | 16 (84.2)      | 2 (10.5)      | 0               |
| Ciprovet (Globavet)                                                                                                         | Ciprofloxacin                   | 12                    | 0              | 11 (91.7)      | 1 (8.3)        | 0             | 0               |
| Conflox (Animal care)                                                                                                       | Enrofloxacin                    | 23                    | 0              | 22 (95.7)      | 1 (4.4)        | 0             | 0               |
| Doxygen (Kepro)                                                                                                             | Doxycycline & Gentamicin        | 27                    | 0              | 26 (96.3)      | 1 (3.7)        | 0             | 0               |
| Enrocoli-Max                                                                                                                | Enrofloxacin & Colistin         | 2                     | 0              | 2 (100)        | 0              | 0             | 0               |
| Enrovet (Globavet)                                                                                                          | Enrofloxacin                    | 3                     | 0              | 3 (100)        | 0              | 0             | 0               |
| Floxinol (Jubili Agrotech)                                                                                                  | Enrofloxacin                    | 7                     | 0              | 6 (85.7)       | 1 (14.3)       | 0             | 0               |
| Flumetin. E.t.c (Augmentin)                                                                                                 | Amoxicillin clavulanate         | 0                     | 0              | 0              | 0              | 0             | 0               |
| Fura                                                                                                                        | Furathadol                      | 11                    | 0              | 11 (100)       | 0              | 0             | 0               |
| GenTylo (Centre)                                                                                                            | Gentamycin & Tylosin            | 13                    | 0              | 13 (100)       | 0              | 0             | 0               |
| Kenflox (Kepro)                                                                                                             | Enrofloxacin                    | 18                    | 0              | 18 (100)       | 0              | 0             | 0               |
| Kepro-Oxy 5% (Kepro)                                                                                                        | Oxytetracycline                 | 14                    | 1 (7.1)        | 13 (92.9)      | 0              | 0             | 0               |
| Neoceryl (Animal care)                                                                                                      | Neomycin & Multivitamins        | 20                    | 0              | 20 (100)       | 0              | 0             | 0               |
| Norflox                                                                                                                     | Norfloxacin                     | 3                     | 0              | 3 (100)        | 0              | 0             | 0               |
| Oxytetracycline 50%                                                                                                         | Oxytetracycline                 | 11                    | 0              | 11 (100)       | 0              | 0             | 0               |
| SulfaThrim                                                                                                                  | Sulfaquinoxaline & Trimethoprim | 0                     | 0              | 0              | 0              | 0             | 0               |
| Tetracin (Jubili Agrotech)                                                                                                  | Oxytetracycline                 | 5                     | 0              | 5 (100)        | 0              | 0             | 0               |
| Tylosin (not specified)                                                                                                     | Tylosin                         | 24                    | 1 (4.2)        | 22 (91.7)      | 1 (4.2)        | 0             | 0               |
| Vapcogent (Vapco)                                                                                                           | Gentamin                        | 1                     | 0              | 1 (100)        | 0              | 0             | 0               |
| Other antibiotics                                                                                                           | Other antibiotics               | 15                    | 0              | 13 (86.7)      | 1 (6.7)        | 0             | 1 (6.7)         |

<sup>1</sup> Respondents selected responses for each antibiotic used, therefore column percentages do not add up to 100%.

**Table S9.** Advice on vaccination protocols, source of vaccines purchased by respondents, and person performing the vaccination on farm.

| Variable                                                                              | Response                                                            | Total respondents (n%) (n=43) | Respondents in Kano (n%) (n=27) | Respondents in Oyo (n%) (n=16) |
|---------------------------------------------------------------------------------------|---------------------------------------------------------------------|-------------------------------|---------------------------------|--------------------------------|
| Who gives advice on the vaccine protocol used on farm? <sup>1</sup>                   | My veterinarian                                                     | 16 (37.2)                     | 8 (29.6)                        | 8 (50.0)                       |
|                                                                                       | Government official (vet, paravet or agriculture extension officer) | 12 (27.9)                     | 12 (44.4)                       | 0                              |
|                                                                                       | No one, I just know what to do                                      | 9 (20.9)                      | 3 (11.1)                        | 6 (37.5)                       |
|                                                                                       | Other person                                                        | 5 (11.6)                      | 4 (14.8)                        | 1 (6.3)                        |
|                                                                                       | Vet shop attendant                                                  | 3 (7.0)                       | 2 (7.4)                         | 1 (6.3)                        |
|                                                                                       | <i>Other</i> <sup>2</sup> - Other farmers                           | 1 (2.3)                       | -                               | -                              |
|                                                                                       | <i>Other</i> - Poultry association                                  | 1 (2.3)                       | -                               | -                              |
|                                                                                       | <i>Other</i> - Private paravet                                      | 1 (2.3)                       | -                               | -                              |
| Where do you source the vaccines?<br>(i.e. location of vaccine supplier) <sup>1</sup> | Vet shop                                                            | 32 (74.4)                     | 21 (77.8)                       | 11 (68.8)                      |
|                                                                                       | Vet pharmaceutical distributor                                      | 8 (18.6)                      | 3 (11.1)                        | 5 (31.3)                       |
|                                                                                       | Veterinarian                                                        | 3 (7.0)                       | 3 (11.1)                        | 0                              |
|                                                                                       | Other person                                                        | 1 (2.3)                       | 1 (3.7)                         | 0                              |
|                                                                                       | Government provides (vet, paravet or agriculture extension officer) | 0                             | 0                               | 0                              |
|                                                                                       | <i>Other</i> - Importers                                            | 1 (2.3)                       | -                               | -                              |
| Who performs the vaccinations on farm? <sup>1</sup>                                   | Farm owner or farm worker                                           | 29 (67.4)                     | 21 (77.8)                       | 8 (50.0)                       |
|                                                                                       | Contracted vet                                                      | 17 (39.5)                     | 9 (33.3)                        | 8 (50.0)                       |
|                                                                                       | Other contracted animal health workers                              | 4 (9.3)                       | 4 (14.8)                        | 0                              |
|                                                                                       | Other professional                                                  | 0                             | 0                               | 0                              |

<sup>1</sup>Respondents selected all applicable responses for these variables; column percentages for specified variable do not add up to 100%. <sup>2</sup>Respondents provided optional alternative response.
